# Supplementary material for: Molybdenum carbide nanotubes: a novel multifunctional material for label-free electrochemical immunosensing
Source: Royal Society of Chemistry journal article supplement (doi:10.1039/c6nr03608b), 2016-01-01
Supplement: c6nr03608b1.pdf [file c6nr03608b1.pdf]

Supporting Information for

**Molybdenum carbide nanotubes: a novel multifunctional  
material for label-free electrochemical immunosensing**

Qingfeng Zhai,<sup>a,b</sup> Xiaowei Zhang,<sup>a,b</sup> Jing Li,<sup>\*,a</sup> Erkang Wang<sup>\*,a</sup>

<sup>a</sup>State Key Laboratory of Electroanalytical Chemistry, Changchun Institute of Applied Chemistry, Chinese Academy of Sciences, Changchun, Jilin, 130022, China.

<sup>b</sup>University of Chinese Academy of Sciences, Beijing, 100039, China.

**\*Corresponding Author**

E-mail: [lijingce@ciac.ac.cn](mailto:lijingce@ciac.ac.cn); [ekwang@ciac.ac.cn](mailto:ekwang@ciac.ac.cn)

Tel: +86-431-85262003. Fax: +86-431-85689711.

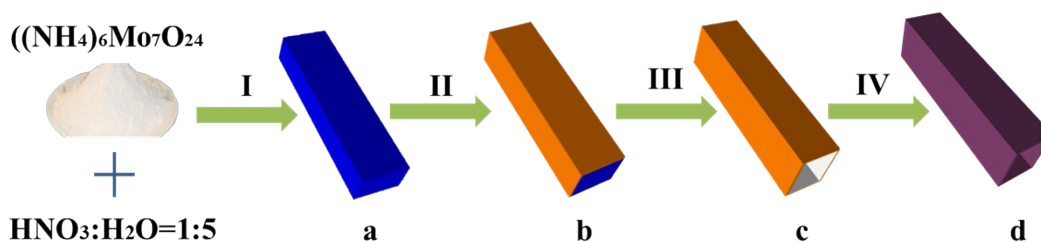

**Scheme S1.** Schematic illustration of the preparation process of Mo<sub>2</sub>C nanotubes. (I) Hydrothermal method for preparation of MoO<sub>3</sub> nanorods. (II) Dopamine was added to form MoO<sub>3</sub>-polydopamine hybrid nanosheets. (III) NH<sub>3</sub>·H<sub>2</sub>O was introduced to etch MoO<sub>3</sub> and form Mo-polydopamine tube. (IV) high-temperature calcination to produce well-crystalline Mo<sub>2</sub>C nanotubes.

**Preparation of Mo<sub>2</sub>C nanotubes.** According to the reported literature, Mo<sub>2</sub>C nanotubes were synthesized through two steps (Scheme S1). MoO<sub>3</sub> nanorods template were firstly prepared through hydrothermal method. Briefly, 1.4 g of ammonium heptamolybdate tetrahydrate  $(\text{NH}_4)_6\text{Mo}_7\text{O}_{24} \cdot 4\text{H}_2\text{O}$  was dissolved in 40 mL of mixed solution of 65% HNO<sub>3</sub> and deionized H<sub>2</sub>O with a volume ratio of 1:5. Then, the above solution was transferred into a Teflon-lined stainless steel autoclave and heated at 200 °C for 20 h. After cooling, the white product was collected by centrifugation and washed with water and ethanol for several times, dried at 70 °C for next step. In the second step, the obtained MoO<sub>3</sub> nanorods were used as template to synthesize Mo<sub>2</sub>C nanotube. In brief, 100 mg of the MoO<sub>3</sub> nanorods was added into 20 mL of deionized H<sub>2</sub>O in a glass bottle and ultrasonic 15 min, then 200 mg of  $(\text{NH}_4)_6\text{Mo}_7\text{O}_{24} \cdot 4\text{H}_2\text{O}$  and 50 mg of dopamine hydrochloride were dissolved into the above solution completely. Then ethanol (40 mL) was poured into the above solution.

After stirring for another 5 min, 28~30 %  $\text{NH}_3 \cdot \text{H}_2\text{O}$  (0.3 mL) was quickly injected into the above reaction solution and the mixed solution reacted for 120 min with gentle stirring. Finally, the orange-red precipitate was obtained by centrifugation, washed several times with ethanol and dried. In order to obtain the well-crystalline  $\text{Mo}_2\text{C}$  nanotubes, the above obtained orange-red precipitate was then annealed at 750 °C under Ar flow.

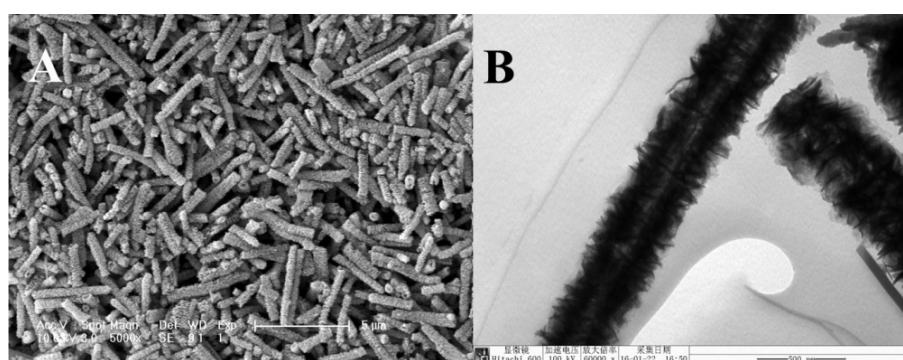

**Figure S1.** (A) SEM and (B) TEM characterizations of the prepared  $\text{Mo}_2\text{C}$  nanotubes.

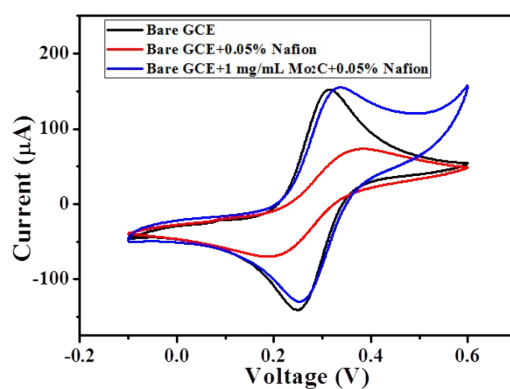

**Figure S2.** CV curve of the bare GCE, 0.05% Nafion modified GCE and 1 mg/mL  $\text{Mo}_2\text{C}$  nanotube + 0.05% Nafion modified GCE in 5 mM  $[\text{Fe}(\text{CN})_6]^{3-/4-}$ .

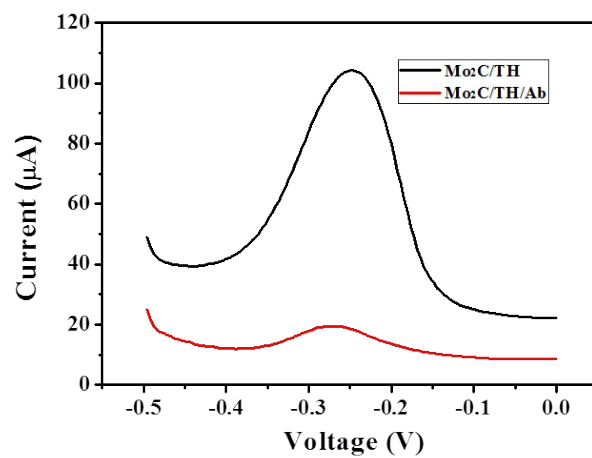

**Figure S3.** DPV curves of GCE modified with Mo<sub>2</sub>C/TH and Mo<sub>2</sub>C/TH/Ab composites.

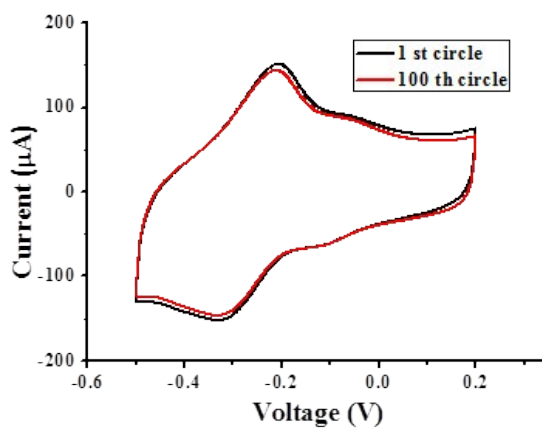

**Figure S4.** The CV curves of Mo<sub>2</sub>C/thionin modified GCE that scan at the first cycle and scan after 100 cycles with the scan rate of 0.8 V/s in 0.1 M PBS buffer (pH=7.4).

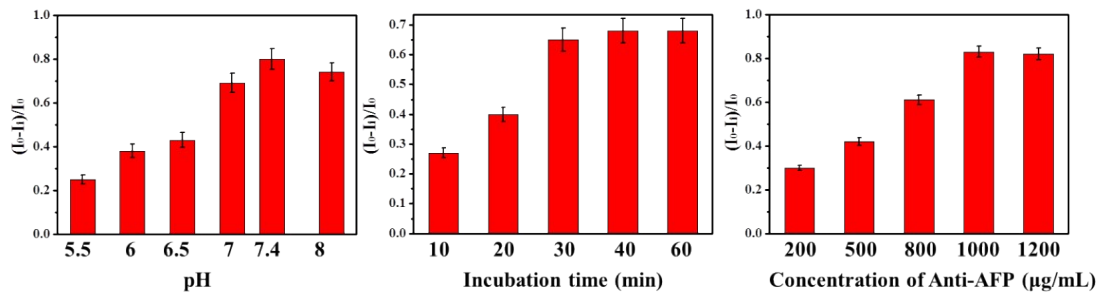

**Figure S5.** Effects of (A) pH of detection solution, (B) the amount of anti-AFP, (C) incubation time on the immunosensor.

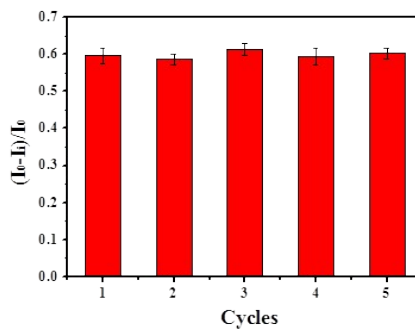

**Figure S6.** The reproducibility of the immunosensor for AFP (1 ng/mL) detection with five electrodes.

**Table S1.** Comparison of different electrochemical immunosensors for detection of AFP.

| Modified materials                               | Linear range<br>(ng/mL) | Detection limit<br>(ng/mL) | Ref.      |
|--------------------------------------------------|-------------------------|----------------------------|-----------|
| graphene/SnO <sub>2</sub> /Au                    | 0.02-50                 | 0.01                       | 1         |
| Au/PAMAM/ethyleneamine–viologen                  | 0.001-45                | 0.00013                    | 2         |
| Au–Pd/N-graphene                                 | 0.05-30                 | 0.005                      | 3         |
| GoldMag nanocomposite/graphene                   | 0.01–200                | 0.001                      | 4         |
| TiO <sub>2</sub> /CdS                            | 0.05-50                 | 0.04                       | 5         |
| gold nanorods                                    | 0.1-200                 | 0.04                       | 6         |
| carbon nanotubes/ mesoporous silica and graphene | 0.1-100                 | 0.06                       | 7         |
| palladium–graphene                               | 0.01-12                 | 0.005                      | 8         |
| Mo <sub>2</sub> C nanotubes/thionin              | 0.01-10                 | 0.003                      | This work |

1. J. Liu, G. Lin, C. Xiao, Y. Xue, A. Yang, H. Ren, W. Lu, H. Zhao, X. Li and Z. Yuan, *Biosens. Bioelectron.*, 2015, **71**, 82-87.
2. B. Kavosi, R. Hallaj, H. Teymourian and A. Salimi, *Biosens. Bioelectron.*, 2014, **59**, 389-396.
3. L. Zhao, S. Li, J. He, G. Tian, Q. Wei and H. Li, *Biosens. Bioelectron.*, 2013, **49**, 222-225.
4. B. Zhang, D. Tang, B. Liu, H. Chen, Y. Cui and G. Chen, *Biosens. Bioelectron.*, 2011, **28**, 174-180.
5. G. L. Wang, J. J. Xu, H. Y. Chen and S. Z. Fu, *Biosens. Bioelectron.*, 2009, **25**, 791-796.
6. C. Zhou, D. Liu, L. Xu, Q. Li, J. Song, S. Xu, R. Xing and H. Song, *Sci. Rep.*, 2015, **5**, 9939.
7. J. Lin, Z. Wei, H. Zhang and M. Shao, *Biosens. Bioelectron.*, 2013, **41**, 342-347.
8. T. Qi, J. Liao, Y. Li, J. Peng, W. Li, B. Chu, H. Li, Y. Wei and Z. Qian, *Biosens. Bioelectron.*, 2014, **61**, 245-250.
